# Supplementary material for: Diet-induced covariation between architectural and physicochemical plasticity in an extended phenotype
Source: Oxford University Press journal article supplement (doi:10.1242/jeb.150029), 2016-01-01
Supplement: jeb150029supp.pdf [file jeb150029supp.pdf]

**Table S1. Results of multivariate Kruskal-Wallis tests comparing the web architectures, droplet morphometrics, and gluey silk properties of webs of pre-treated spiders allocated into the feeding treatments.**

Shows treatment allocations for (A) Experiment 1: cricket or cockroach feeding treatment, and (B) Experiment 2: adult or juvenile cricket feeding treatment.

| (A) Experiment 1       |                   | Statistics |        |                            | Mean rank |           |
|------------------------|-------------------|------------|--------|----------------------------|-----------|-----------|
|                        |                   | Z adjusted | P      | Kruskal-Wallis<br>H (N=36) | Cricket   | Cockroach |
| Web architecture:      | Capture area      | 0.967      | 0.328  | 0.986                      | 20.111    | 16.889    |
|                        | Mesh size         | -0.237     | 0.812  | 0.641                      | 18.056    | 18.994    |
|                        | Number of radii   | 0.619      | 0.535  | 0.403                      | 19.611    | 17.389    |
|                        | Decoration length | 2.325      | 0.020* | 5.482                      | 22.61     | 14.389    |
| Droplet morphometrics: | Thread width      | -1.297     | 0.195  | 1.724                      | 16.194    | 20.805    |
|                        | Droplet volume    | 0.964      | 0.334  | 0.961                      | 20.222    | 16.777    |
|                        | DV/0.5 mm         | 2.641      | 0.008* | 7.063                      | 23.167    | 13.833    |
|                        | DSA: DV           | 0.964      | 0.334  | 0.962                      | 20.222    | 16.778    |
| Gluey silk properties: | Stickiness        | 0.310      | 0.765  | 0.107                      | 16.941    | 18.058    |
|                        | P concentration   | -0.459     | 0.646  | 0.225                      | 17.667    | 19.333    |
|                        | K concentration   | 0.982      | 0.325  | 0.997                      | 20.050    | 16.750    |

Median tests: Web architecture,  $\chi^2 = 0.111$ , df = 1, P = 0.738. Spiral morphometrics,  $\chi^2 = 7.111$ , df = 1, P = 0.008. Glue properties,  $\chi^2 = 0.444$ , df = 1, P = 0.505

| (B) Experiment 2       |                   | Statistics |        |                             | Mean rank     |                     |
|------------------------|-------------------|------------|--------|-----------------------------|---------------|---------------------|
|                        |                   | Z adjusted | P      | Kruskall-Wallis<br>H (N=37) | Adult cricket | Juvenile<br>cricket |
| Web architecture:      | Capture area      | -1.790     | 0.192  | 3.480                       | 22.611        | 14.839              |
|                        | Mesh size         | 0.456      | 0.800  | 0.064                       | 18.055        | 18.744              |
|                        | Number of radii   | 0.991      | 0.525  | 0.403                       | 19.611        | 17.838              |
|                        | Decoration length | -1.091     | 0.320  | 0.986                       | 20.111        | 16.888              |
| Droplet morphometrics: | Thread width      | -1.056     | 0.267  | 1.230                       | 16.972        | 20.805              |
|                        | Droplet volume    | 3.503      | 0.001* | 10.779                      | 25.0          | 13.131              |
|                        | DV/0.5 mm         | 2.896      | 0.007* | 7.830                       | 26.444        | 11.947              |
|                        | DSA: DV           | 3.896      | 0.001* | 16.957                      | 13.722        | 24.0                |
| Gluey silk properties: | Stickiness        | 2.783      | 0.003* | 8.333                       | 15.572        | 22.289              |
|                        | P concentration   | 1.402      | 0.236  | 1.404                       | 16.667        | 21.333              |
|                        | K concentration   | 0.935      | 0.638  | 0.473                       | 20.250        | 16.750              |

Median tests: Web architecture,  $\chi^2 = 0.114$ , df = 1, P = 0.735. Spiral morphometrics,  $\chi^2 = 22.702$ , df = 1, P = 0.0001. Glue properties,  $\chi^2 = 0.444$ , df = 1, P = 0.505
